# Supplementary material for: Salmonella enterica mediated epigenetic promotion of fibrosis is a novel factor in benign prostatic hyperplasia
Source: Springer Nature journal article supplement (doi:10.1186/s40779-025-00614-2), 2025-05-29
Supplement: MOESM1 [file 40779_2025_614_MOESM1_ESM.pdf]

## Methods

### Cell proliferation assay

WPMY-1 and BPH-1 cells ( $2 \times 10^3$  cells/well) were seeded into a 96-well plate, and cell proliferation was assessed using the cell counting kit-8 (CCK-8, Dojindo Laboratories, Kumamoto, Japan). All experiments were performed in triplicate. Proliferation curves were generated based on absorbance measurements taken at specified time intervals. To assess cellular sensitivity to the ferroptosis inducer RSL3, cells ( $4 \times 10^3$ ) were seeded into a 96-well plate and treated with *S.e*-LPS for 24 h, followed by exposure to various concentrations of the drug for an additional 24 h. CCK-8 assay was performed to measure cell viability at the indicated time points, and IC<sub>50</sub> values were calculated using GraphPad Prism.

### Cell apoptosis, cycle assays

WPMY-1 and BPH-1 cells ( $1.5 \times 10^5$  cells/well) in a 6-well plate were treated with the indicated concentrations of *S.e*-LPS and then incubated for 24 h. Cells were collected after washing with phosphate buffered saline (PBS) three times and gently mixed with Annexin V-FITC and propidium iodide staining solution by using the Apoptosis Detection Kit (LiankeBio, Hangzhou, China). It was incubated at room temperature for 15 min, and they were detected by flow cytometry (NovoCyte 3000, Agilent Technologies, CA, USA) after 15 min of incubation. For cell cycle distribution analysis, cells were collected and detected by the Cell Cycle Staining Kit (LiankeBio, Hangzhou, China) according to the manufacturer's instructions. Then the cells were detected by flow cytometry.

### Cell contraction assays

WPMY-1 cells were suspended ( $3.0 \times 10^6$  cells/ml) in a cell contraction matrix (Cell Biolabs, San Diego, CA, USA). This collagen-cell mixture was dispensed in 0.5 ml aliquots into 24-well culture plates, and the mixture was polymerized at 37 °C for 1 h. Immediately after polymerization, 1 ml of culture medium with *S.e*-LPS (1 µg/ml) or PBS was added to each well. After 72 h incubation, the collagen gels were photographed, and the surface area of the gels was measured.

### Reactive oxygen species (ROS) and lipid peroxidation detection and measurement

The presence of ROS was measured by ROS Assay Kit (Beyotime, Shanghai, China), while lipid peroxidation was measured by BODIPY™ 581/591 C11 Assay Kit (Thermo Fisher, Shanghai, China).

Following 24 h of various treatments, 10  $\mu\text{mol/L}$  DCFH-DA was introduced into the medium for ROS detection, and 5  $\mu\text{mol/L}$  was added for lipid peroxidation assessment. Then incubated together for 30 min at 37 °C. Post-incubation, the samples were washed three times with PBS, and then cells were collected and analyzed by flow cytometry. The FITC channel signal was monitored and quantified. A minimum of  $1 \times 10^4$  cells were analyzed per sample, with each experiment conducted independently at least three times.

### **Immunofluorescence cell staining**

WPMY-1 and BPH-1 cells were cultured on a sterile confocal petri dish (Biosharp, Anhui, China), subsequently fixed in methanol for 15 min, permeabilized with 0.1% Triton X-100, and blocked with 1% bovine serum albumin (BSA) for 30 min. The cells were then incubated overnight at 4 °C with either rabbit anti-m<sup>6</sup>A (Epigentek, USA) or rabbit anti-ALKBH5 (Abcam, USA) antibodies. After washing three times, the cells were probed with Alexa-Fluor-555-conjugated goat anti-rabbit-IgG (Abcam) for 1 h at room temperature, followed by nuclear counterstaining with 4',6-diamidino-2-phenylindole (DAPI) (Beyotime, Shanghai, China). Observations were conducted using confocal fluorescence microscopy (Leica, Germany).

### **Transmission electron microscopy of mitochondrial structures**

For detecting the morphological changes associated with ferroptosis, samples were fixed in 3% phosphate-glutaraldehyde at 4 °C for 4 h, washed with 0.1 mol/L PBS (pH 7.4), and embedded in 1% agarose. Post-fixation with 1% osmium tetroxide was performed for 2 h, followed by gradient ethanol dehydration (30 – 100%) and acetone substitution. Infiltration was achieved using 812 embedding resins mixed with acetone at 37 °C, followed by polymerization in pure resin at 60 °C for 48 h. Ultrathin sections (60 nm) were collected on copper grids, stained with 2% uranyl acetate and 2.6% lead citrate, and dried for analysis. Cells were observed in transmission electron microscopy (TEM) by Hitachi (HT7700 Exalens).

**Table S1** RNA oligonucleotides sequences used in this study

| Gene                  | Sequence (5'-3')      |
|-----------------------|-----------------------|
| <i>shALKBH5#1</i>     | GCGCCGTCATCAACGACTA   |
| <i>shALKBH5#2</i>     | CTGCGCAACAAGTACTTCT   |
| <i>shALKBH5</i> (rat) | CGGCCTCAGGACATCAAAGAA |

**Table S2** Antibodies used for immunofluorescence (IF) and immunohistochemistry staining (IHC)

| Antibodies                                                   | Source species | Dilution ratio | Supply                  |
|--------------------------------------------------------------|----------------|----------------|-------------------------|
| Primary antibody                                             |                |                |                         |
| N <sup>6</sup> -methyladenosine (m <sup>6</sup> A) Antibody  | Rabbit         | 1:500 (IF)     | Epigentek, A-1801-100   |
| ALKBH5                                                       | Rabbit         | 1:200 (IF)     | Abcam, ab195377         |
| GPX4                                                         | Mouse          | 1:500 (IHC)    | Proteintech, 67763-1-Ig |
| Collagen I                                                   | Rabbit         | 1:1000 (IHC)   | Servicebio, GB115707    |
| <i>Salmonella enterica</i> serotype enteritidis LPS antibody | Mouse          | 1:50 (IF)      | Sigma SAB4200882        |
| Secondary antibody                                           |                |                |                         |
| Donkey Anti-Rabbit IgG H&L (Alexa Fluor <sup>®</sup> 647)    | Donkey         | 1:1000 (IF)    | Abcam, ab150075         |
| Goat anti-mouse-IgG-HRP                                      | Goat           | 1:1000 (IHC)   | Abcam, ab6789           |
| Goat anti-rabbit-IgG-HRP                                     | Goat           | 1:2000 (IHC)   | Abcam, ab205718         |

*ALKBH5* AlkB homolog 5, *GPX4* glutathione peroxidase 4, *LPS* lipopolysaccharide, *HRP* horseradish peroxidase

**Table S3** Primers and RNA oligonucleotide sequences used in this study

| Gene             | Forward primer (5' – 3')  | Reverse primer (5' – 3')  |
|------------------|---------------------------|---------------------------|
| <i>METTL3</i>    | TTAGCCTTCGGGGTGTCCG       | TAGATCCAAGTGCCCCGAGT      |
| <i>METTL4</i>    | CTTGGTCTGTGGAGGTAGTTGC    | CCAGTATAAGACCTTCGTAGGGC   |
| <i>METTL5</i>    | GCCCAAGCTACTTCTGGAACAG    | CCGATGCTAAGTACTCCACAACC   |
| <i>METTL14</i>   | CTGAAAGTGCCGACAGCATTGG    | CTCTCCTTCATCCAGATACTTACG  |
| <i>METTL16</i>   | TGGAGCAACCTTGAATGGCTGG    | CCATCAGGAGTGTCTTCTGTGG    |
| <i>WTAP</i>      | GCAACAACAGCAGGAGTCTGCA    | CTGCTGGACTTGCTTGAGGTAC    |
| <i>KIAA1429</i>  | TGACCTTGCCTCACCAACTGCA    | AGCAACCTGGTGGTTTGGCTAG    |
| <i>RBM15</i>     | GATTCCTCTCCACACCTGACTTC   | TGTTGCCAGAGACGAAGTGGAG    |
| <i>RBM15B</i>    | TGGTAACCTGGACCACAGCGTA    | GGTCTGGAAGTTGAGGAAGGC     |
| <i>ZC3H13</i>    | CGGACAGTGATGCCTACAACAG    | TCTGTGAGGTGCGAGGGACTAA    |
| <i>CBLL1</i>     | AACAGGATGCCTGCAAAGGCTC    | GGTGTCCAGGAAATCTTCGCTG    |
| <i>ZCCHC4</i>    | CTTCCAGATGCTGGATTACCAGG   | CGGAATGTTGGTGAAAATACGCAC  |
| <i>PCIF1</i>     | CTCTGCCTTTGAGAGGTTCTTG    | AGCACTCGAAGCTGACGCCAAA    |
| <i>ALKBH1</i>    | TTACTACCGCCTGGACTCCACA    | CCTCATCCCTTTGAAGACCACC    |
| <i>ALKBH5</i>    | CCAGCTATGCTTCAGATCGCCT    | GGTCTCTTCCTTGTCCATCTCC    |
| <i>FTO</i>       | CCAGAACCTGAGGAGAGAATGG    | CGATGTCTGTGAGGTCAAACGG    |
| <i>YTHDF1</i>    | CAAGCACACAACCTCCATCTTCG   | GTAAGAACTGGTTCGCCCTCAT    |
| <i>YTHDF2</i>    | TAGCCAGCTACAAGCACACCAC    | CAACCGTTGCTGCAGTCTGTGT    |
| <i>YTHDF3</i>    | GCTACTTTCAAGCATACCACCTC   | ACAGGACATCTTCATACGGTTATTG |
| <i>YTHDC1</i>    | TCAGGAGTTCGCCGAGATGTGT    | AGGATGGTGTGGAGGTTGTTCC    |
| <i>YTHDC2</i>    | GAAAGCTCCTGAACCTCCACCA    | GGTCTACTGGCAAGTCAGCCA     |
| <i>ELAVL1</i>    | TGTTCTCTCGGTTTGGGCGGAT    | TCTTCTGCCTCCGACCGTTTGT    |
| <i>FMRI</i>      | CAAAGGACAGCATCGCTAATGCC   | GCTCCAATCTGTCGCAACTGCT    |
| <i>EIF3A</i>     | CGTAATGCGACTCAAAGCTGCAC   | ACGCTGCCTTTTCCGTTCTTCC    |
| <i>G3BP1</i>     | AGCCTGTTTCAAGAAAGTCCTTAGC | CGAAGGCGATTATCTCGTCGGT    |
| <i>G3BP2</i>     | GAGCTGAAACCACAAGTGGAGG    | GGTCACTGAAGCCCAGGAGAAA    |
| <i>HNRNPA2B1</i> | CAGCAACCTTCTAACTACGGTCC   | CACTGCCTCCTGGACCATAGTT    |
| <i>PRRC2A</i>    | CTTCTACCCTCCTGGTGTGCAT    | CGTTCCCGTAACATAGCAGGTG    |
| <i>IGF2BP1</i>   | CTTTGTAGGGCGTCTCATTGGC    | CCTTCACAGTGATGGTCCTCTC    |

| Gene           | Forward primer (5' – 3') | Reverse primer (5' – 3')     |
|----------------|--------------------------|------------------------------|
| <i>IGF2BP2</i> | GTTGGTGCCATCATCGGAAAGG   | TGGATGGTGACAGGCTTCTCTG       |
| <i>IGF2BP3</i> | TCGTGACCAGACACCTGATGAG   | GGTGCTGCTTTACCTGAGTCAG       |
| <i>HNRNPC</i>  | TGGGCTGCTCTGTTTCATAAGGG  | CTCGGTTCACTTTTGGCTCTGC       |
| <i>GPX4</i>    | ACAAGAACGGCTGCGTGGTGAA   | GCCACACACTTGTGGAGCTAGA       |
| <i>SLC7A11</i> | TCCTGCTTTGGCTCCATGAACG   | AGAGGAGTGTGCTTGCGGACAT       |
| <i>ACSL4</i>   | GCTACTTGCCTTTGGCTCATGTGC | GTGTGGGCTTCAGTACAGTACAGTCTCC |
| <i>GPX4-1</i>  | CGCCGCGATGAGCCT          | GTGACGATGCACACGAAGC          |
| <i>GPX4-2</i>  | CACCGTCTCTCCACAGTTCC     | ACGCTGGATTTTCGGGTCTG         |
| <i>GPX4-3</i>  | GGACCTGCCCCACTATTTCTA    | TTTATTCCCACAAGGTAGCCAG       |

*METTL3* methyltransferase like 3, *WTAP* Wilms tumor 1-associated protein, *RBM15* RNA binding motif protein 15, *ZC3H13* Zinc finger CCCH-type containing 13, *CBL1* Casitas B-lineage lymphoma proto-oncogene-like 1, *ZCCHC4* Zinc finger, CCHC-type containing 4, *PCIF1* phosphorylated CTD interacting factor 1, *ALKBH1* Alk B homolog 1, *FTO* fat mass and obesity-associated protein, *YTHDF3* YTH domain family member 3, *ELAVL1* ELAV-like RNA binding protein 1, *FMRI* fragile X mental retardation 1, *EIF3A* eukaryotic translation initiation factor 3 subunit A, *G3BP1* GTPase activating protein binding protein 1, *HNRNP A2/B1* heterogeneous nuclear ribonucleoprotein A2/B1, *PRRC2A* proline-rich coiled-coil 2A, *IGF2BP3* insulin-like growth factor 2 mRNA binding protein 3, *HNRNPC* heterogeneous nuclear ribonucleoprotein C, *GPX4* glutathione peroxidase 4, *SLC7A11* solute carrier family 7 member 11, *ACSL4* Acyl-coa synthetase long-chain family member 4

**Table S4** Antibodies used for Western blotting analysis

| Antibodies                  | Source species | Dilution ratio | Supply                        |
|-----------------------------|----------------|----------------|-------------------------------|
| Primary antibody            |                |                |                               |
| ALKBH5                      | Rabbit         | 1:1000         | Abcam, ab195377               |
| GPX4                        | Rabbit         | 1:1000         | Abclonal, A11243              |
| SLC7A11                     | Rabbit         | 1:1000         | Abclonal, A2413               |
| ACSL4                       | Rabbit         | 1:1000         | Proteintech, 22401-1-AP       |
| $\alpha$ -SMA               | Rabbit         | 1:10,000       | abcam, ab124964               |
| N-cadherin                  | Rabbit         | 1:2000         | Proteintech, 22018-1-AP       |
| Vimentin                    | Rabbit         | 1:20000        | Abclonal, A19607              |
| Collagen I                  | Rabbit         | 1:1000         | Abcam, ab138492               |
| MMP2                        | Rabbit         | 1:1000         | Abcam, ab97779                |
| MMP9                        | Rabbit         | 1:1000         | Abcam, ab76003                |
| TIMP1                       | Rabbit         | 1:1000         | Abcam, ab211926               |
| TIMP3                       | Rabbit         | 1:1000         | Proteintech, 10858-1-AP       |
| GAPDH                       | Rabbit         | 1:10,000       | Abcam, ab181602               |
| Secondary antibody          |                |                |                               |
| Anti-rabbit-IgG (H + L)-HRP | Goat           | 1:10,000       | Beyotime Biotechnology, A0208 |

*ALKBH5* AlkB homolog 5, *GPX4* glutathione peroxidase 4, *SLC7A11* solute carrier family 7 member 11, *ACSL4* acyl-coa synthetase long-chain family member 4,  *$\alpha$ -SMA*  $\alpha$ -smooth muscle actin, *MMP* matrix metalloproteinase, *TIMP1* tissue inhibitor of metalloproteinases 1, *GAPDH* glyceraldehyde-3-phosphate dehydrogenase

**Table S5** Clinical data of tissue samples from patients with BPH

| Parameters                                                                    | LF ( <i>n</i> = 9) | HF ( <i>n</i> = 10) | <i>P</i> -value |
|-------------------------------------------------------------------------------|--------------------|---------------------|-----------------|
| Age (year, mean $\pm$ SD)                                                     | 71.2 $\pm$ 7.6     | 68.9 $\pm$ 8.1      | 0.529           |
| Volume (ml, mean $\pm$ SD)                                                    | 50.93 $\pm$ 16.29  | 67.87 $\pm$ 26.65   | 0.118           |
| IPSS (score, mean $\pm$ SD)                                                   | 21.67 $\pm$ 6.44   | 29.30 $\pm$ 6.50    | 0.020           |
| tPSA ( $\mu$ g/L, mean $\pm$ SD)                                              | 5.93 $\pm$ 4.58    | 11.45 $\pm$ 10.46   | 0.163           |
| fPSA [ $\mu$ g/L, <i>M</i> ( <i>Q</i> <sub>1</sub> , <i>Q</i> <sub>3</sub> )] | 0.74 (0.62, 1.16)  | 1.41 (0.64, 2.78)   | 0.360           |
| fPSA/tPSA (mean $\pm$ SD)                                                     | 0.21 $\pm$ 0.07    | 0.22 $\pm$ 0.10     | 0.869           |
| PSA density (ng/ml <sup>2</sup> , mean $\pm$ SD)                              | 0.12 $\pm$ 0.10    | 0.16 $\pm$ 0.11     | 0.478           |
| BMI (kg/m <sup>2</sup> , mean $\pm$ SD)                                       | 21.63 $\pm$ 4.00   | 23.53 $\pm$ 2.34    | 0.258           |
| Hypertension [ <i>n</i> (%)]                                                  | 3 (33.3)           | 4 (40.0)            | 1               |

*BPH* benign prostatic hyperplasia, *IPSS* International Prostate Symptom Score, *PSA* prostate-specific antigen, *tPSA* total PSA, *fPSA* free PSA, *BMI* body mass index, *LF* low-fibrosis, *HF* high-fibrosis



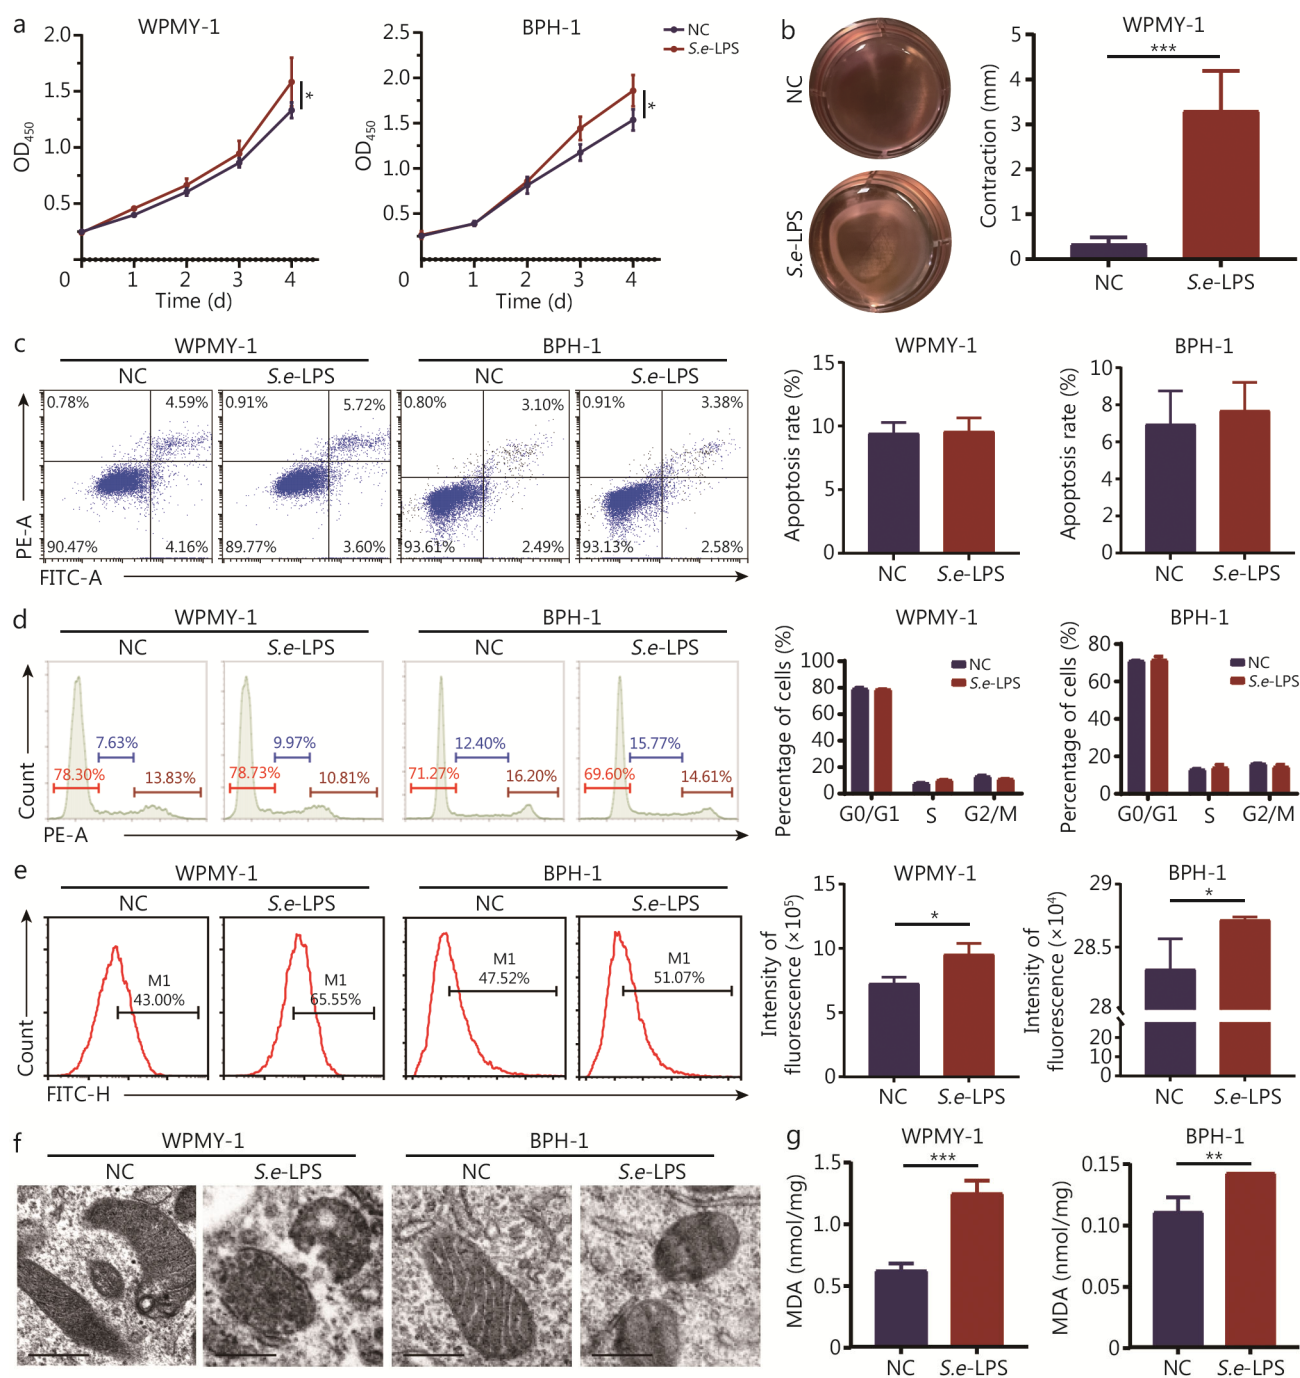

**Fig. S1** *S.e*-LPS promotes cell proliferation and lipid peroxidation. **a** Cell proliferation curves were detected by CCK-8 assays after treatment with *S.e*-LPS in WPMY-1 and BPH-1 cells. **b** Capacity of cell contraction was detected by cell contraction assay after treatment with *S.e*-LPS in WPMY-1 cells. **c** Flow cytometry apoptotic representative images of WPMY-1 and BPH-1 cells treated with *S.e*-LPS for 24 h. **d** Flow cytometry representative images and quantitative analyses of the cell cycle of WPMY-1 and BPH-1 cells treated with *S.e*-LPS for 24 h. **e** Flow representative images and quantitative analysis of ROS after treatment with *S.e*-LPS for 24 h in WPMY-1 and BPH-1 cells. **f** Representative images of transmission electron microscopy of WPMY-1 and BPH-1 cells. Scale bar = 200 nm. **g** Results of malondialdehyde (MDA) in WPMY-1 and BPH-1 cells after treating with *S.e*-

LPS. \* $P < 0.05$ , \*\* $P < 0.01$ , \*\*\* $P < 0.001$ . *S.e*-LPS lipopolysaccharide of *Salmonella enterica*, MDA malondialdehyde
